# Supplementary material
Source: Springer Nature journal article supplement (https://www.springermedizin.de/resource/supplementary/12877_2013_1036_MOESM1_ESM.pdf/9440678)
Supplement: MOESM1 [file 9440678]

Distribute flyers to all U3A members/ invitation to the briefing session

SCREENING FOR INCLUSION CRITERIA

People who express interest in the study will be contacted through an initial phone call to screen to ensure they meet the study inclusion criteria.

Eligible Participants provide informed consent

FALL RISK ASSESSMENT

Comprehensive assessment of balance and turning problem

Group with turning performance\* outside of normal limits (n=68)

\*CLASSIFICATION  
OF TURNING  
INSTABILITY

Step quick test –  
turn time (s) or  
turn sway ( $\text{degs}^{-1}$ )  
measures  
Neurocom  
Balance Master  
outside  
normative data  
provided by  
Neurocom (age  
and gender  
matched)

Randomization

Control group  
Continue with usual  
activity (n=34)

Intervention group  
Prescribed with 16 week home  
based exercise (n=34)

Re-assessment after 16 weeks
